# Supplementary material for: Construction of covalent organic frameworks from nanospheres for Cu2+ detection
Source: Royal Society of Chemistry journal article supplement (doi:10.1039/d3ce00413a), 2023-01-01
Supplement: d3ce00413a1.pdf [file d3ce00413a1.pdf]

## Supporting Information

# Construction of covalent organic frameworks from nanosphere for Cu<sup>2+</sup> detection

Wenyue Ma, Zijian Gu, Canran Wang, Liangyu Dong, Zhaoyang Liu, Leijing Liu,

Bin Xu and Wenjing Tian\*

State Key Laboratory of Supramolecular Structure and Materials, College of Chemistry, Jilin University,

Changchun 130012, China

Correspondence: wjtian@jlu.edu.cn

### 1. Instrumentations

The solid-state <sup>13</sup>C cross-polarization/magic-angle spinning (CP/ MAS) NMR spectra were collected using a Bruker AVANCE III 400 WB spectrometer. The time-of-flight mass spectra were recorded using a Kratos MALDI-TOF mass system. Fourier transform infrared (FT-IR) spectra were recorded on a Vertex 80 V spectrometer. The samples were grinded into powder and dried, then mixed with dried KBr (powder) and pressed into piece. UV-Vis spectra were recorded with a Shimadzu UV-2550 spectrophotometer. Fluorescence spectroscopy was taken using a Shimadzu RF-5301 PC spectrometer. SEM images were recorded using scanning electron microscopy (Hitachi Regulus 8100). A drop of the aqueous solution was dripped directly onto a silicon wafer and air-dried. The TEM images were recorded using a JEM-2100F instrument with an accelerating voltage of 200 kV. The samples were prepared by placing a drop of the stock solution on a 300-mesh, carbon-coated copper grid and air-dried before measurement. The N<sub>2</sub> adsorption–desorption isotherms were measured using a Quantachrome Autosorb-iQ2 analyzer. Powder X-ray diffraction (PXRD) was performed with a Rigaku D/MAX2550 diffractometer using Cu-K $\alpha$  radiation, 40 kV, 200 mA at room temperature.

### 2. Synthesis of TFPB-ED HS

The synthetic method of TFPB-ED HS was performed according to previous literature [1].

### 3. Synthesis of TFPB-DETH COF

TFPB (19.522 mg) and DETH (21.17 mg) were mixed in the presence of mesitylene / dioxane / 6 M AcOH (6/4/1 by vol.; 1.1 mL) in a Pyrex tube (10 mL), which was degassed by three freeze-

pump-thaw cycles. The tube was sealed off and heated at 120 °C for 3 days. The production was collected by centrifugating and washing with anhydrous THF several times. The resulting powder was pale yellow powder.

#### **4. Synthesis of Transformed-TFPB-DETH COF**

TFPB-ED HS (5 mg) and DETH (6.4 mg) were mixed in the presence of mesitylene / dioxane / 6 M AcOH (6/4/1 by vol.; 1.1 mL) in a Pyrex tube (10 mL), which was degassed by three freeze-pump-thaw cycles. The tube was sealed off and heated at 120 °C for 3 days. The production was collected by centrifugating and washing with anhydrous THF and acetone several times. The resulting powder was pale yellow powder. Transformed-TFPB-BTA COF and Transformed-TFPB-DHz COF were prepared by the mixed solution of mesitylene and dioxane.

#### **5. Quantum yield determination of the Transformed-TFPB-DETH COF**

First, we select the integrating sphere attachment and the solvent test mode. Then, the fluorescence spectra of the blank solvent and the COF suspension (0.33 mg / mL) are measured with the excitation wavelength of 365 nm. Finally, data fitting is performed to obtain quantum efficiency data.

#### **6. Molecular simulation**

The lattice model was optimized through using the Materials Studio Forcite molecular dynamics module under ultra-fine, Universal force fields, Ewald summations condition to determine the structure of Transformed-TFPB-DETH COF, Transformed-TFPB-BTA COF and Transformed-TFPB-DHz COF. Then Pawley refinements were conducted using Reflex to fit profiles of PXRD.

#### **7. Sensing Experiment of the Transformed- COFs toward Cu<sup>2+</sup>**

Stock solution of the Transformed-COFs (1 mg/mL) were prepared by dispersing fine powder of the Transformed-COFs in EtOH. The mixed solutions were sonicated for a while to produce homogeneous suspensions and used for luminescent measurements. The sensing experiments were performed by adding aqueous solutions of chloride metal salts at specific concentrations into 3 mL the COF suspension at room temperature and recording the luminescence data immediately.

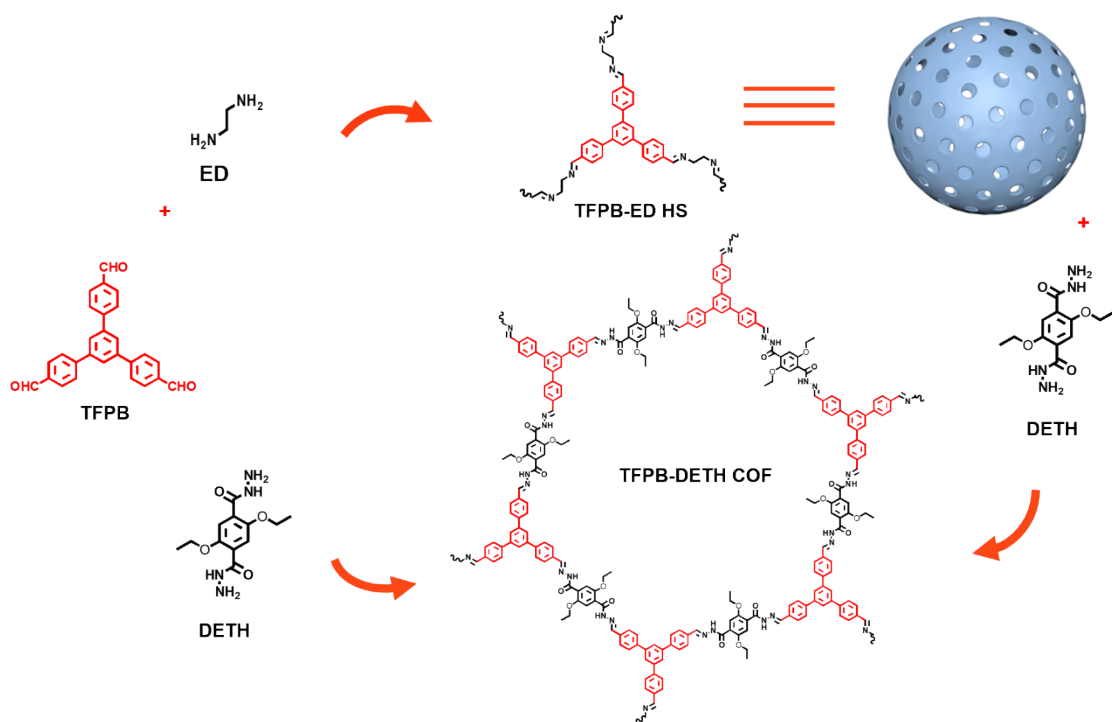

**Fig. S1.** Synthesis routes of TFPB-ED HS and the COF.

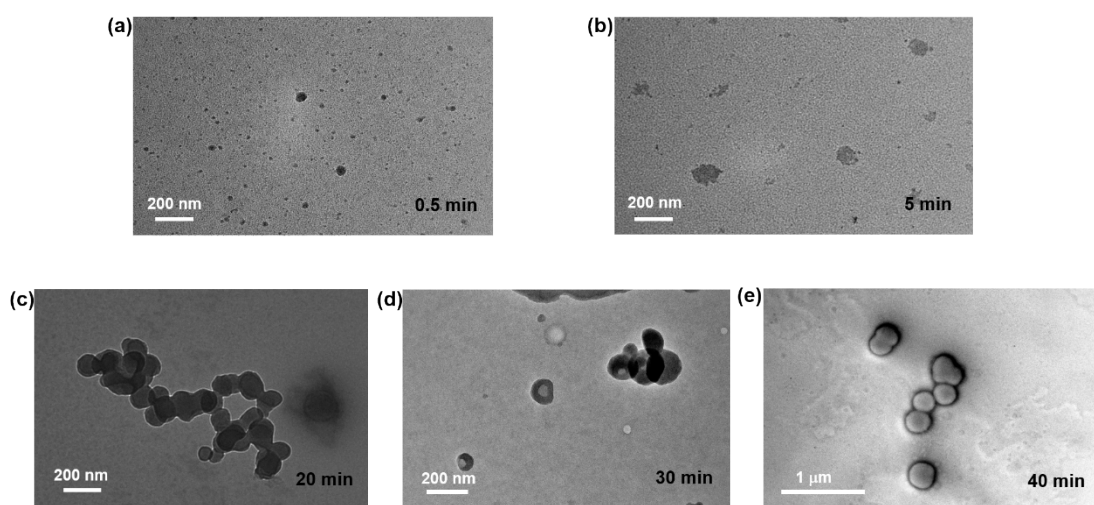

**Fig. S2.** TEM images of the growth of nanospheres at different times.

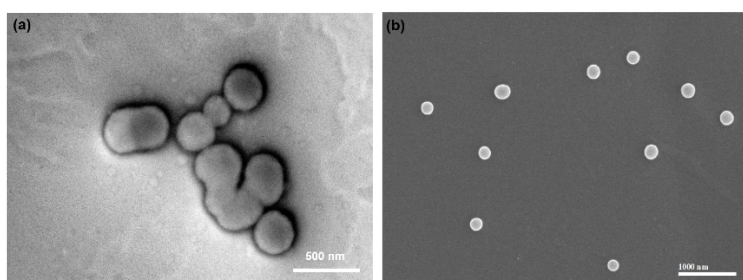

**Fig. S3.** (a) TEM image of the nanosphere, (b) SEM image of the nanosphere.

**Table S1.** Synthesis of the Transformed-TFPB-DETH COF under different solvothermal conditions.

| Solvent (1 mL)         | Catalyst (0.1 mL) | Temperature |
|------------------------|-------------------|-------------|
| Dioxane:mesitylene=3:2 | 6.0 mol/L HAc     | 120 °C      |
| Dioxane:mesitylene=1:2 |                   |             |
| Dioxane:mesitylene=1:3 |                   |             |
| Dioxane:mesitylene=1:1 |                   |             |
| Dioxane                |                   |             |
| Mesitylene             |                   |             |
| Dioxane:mesitylene=3:2 | 6.0 mol/L HAc     | 90 °C       |
| Dioxane:mesitylene=1:2 |                   |             |
| Dioxane:mesitylene=1:3 |                   |             |
| Dioxane:mesitylene=1:1 |                   |             |

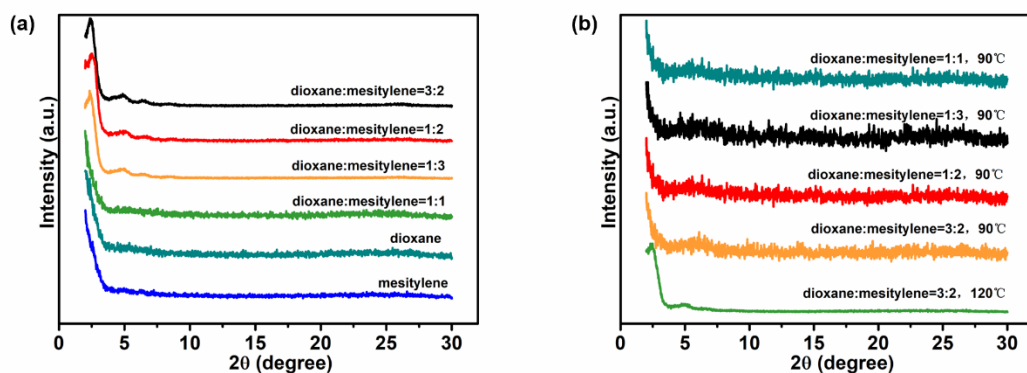

**Fig. S4.** (a) XRD patterns of the Transformed-TFPB-DETH COF in various reacting solvents, (b) XRD patterns of the Transformed-TFPB-DETH COF in different reacting temperatures.

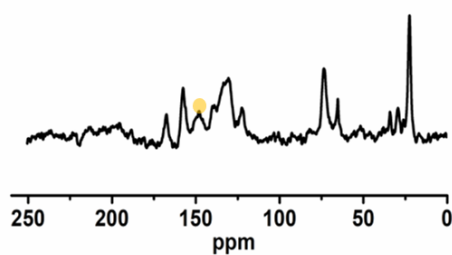

**Fig. S5.** Solid-state <sup>13</sup>C NMR spectrum of the Transformed-TFPB-DETH COF.

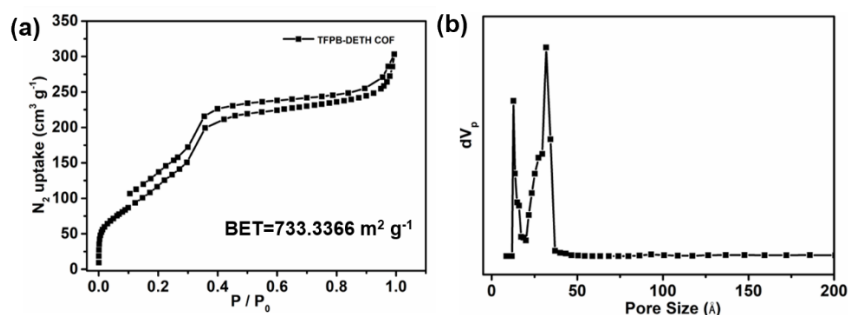

**Fig. S6.** (a)  $N_2$  adsorption/ desorption isotherms, (b) pore size distribution of the Transformed-TFPB-DETH COF.

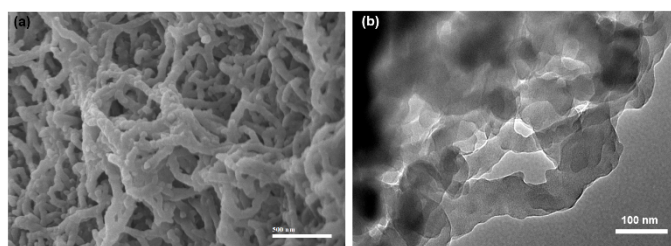

**Fig. S7.** (a) SEM image of the Transformed-TFPB-DETH COF, (b) TEM image of the Transformed-TFPB-DETH COF.

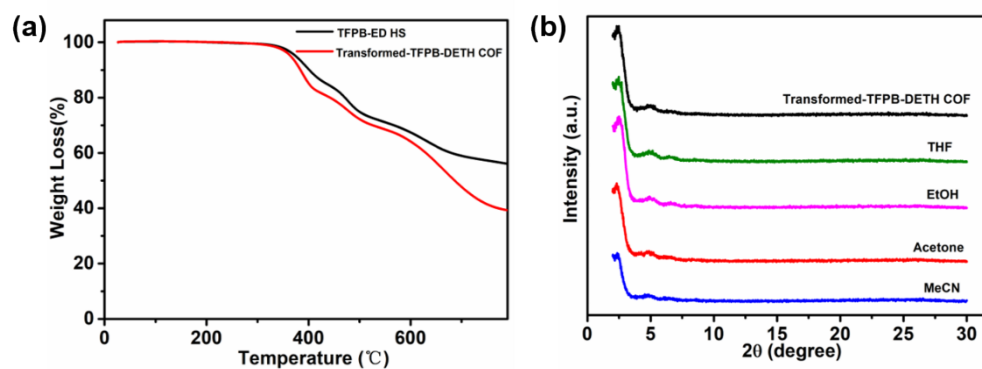

**Fig. S8.** (a) TGA curves of the Transformed-TFPB-DETH COF and TFPB-ED HS, (b) XRD patterns of the Transformed-TFPB-DETH COF after immersion in various solvents for 72 h.

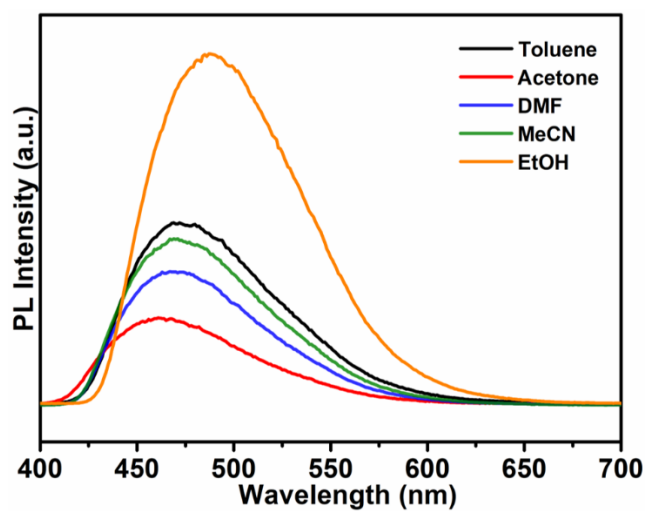

**Fig. S9.** PL spectrum of the Transformed-TFPB-DETH COF in different solvents.

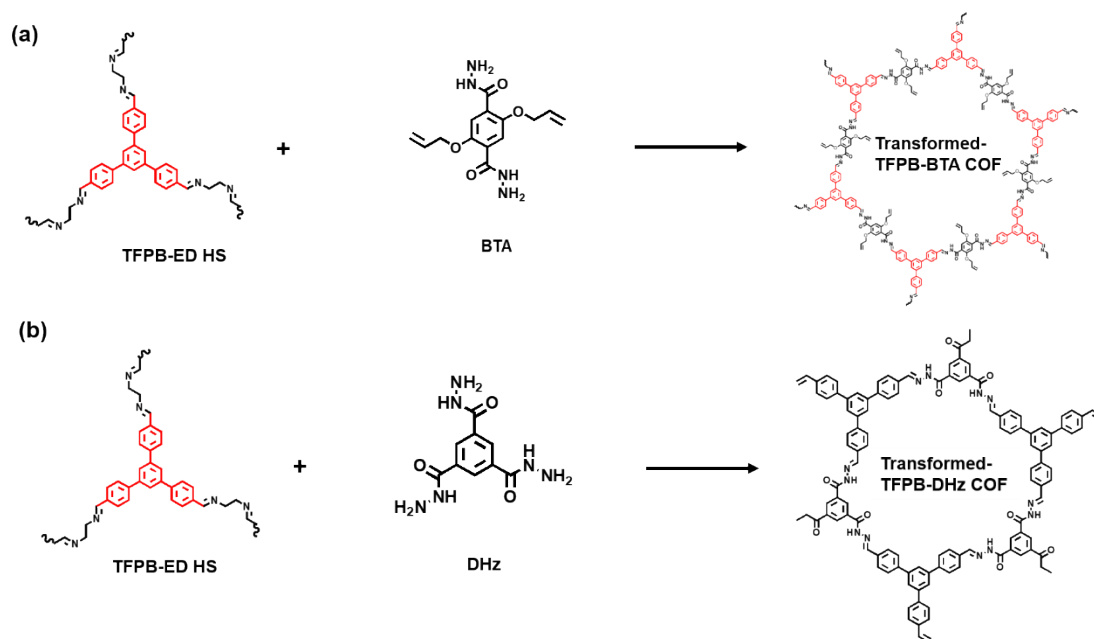

**Fig. S10.** Synthesis routes of (a) the Transformed-TFPB-BTA COF, (b) the Transformed-TFPB-DHz COF.

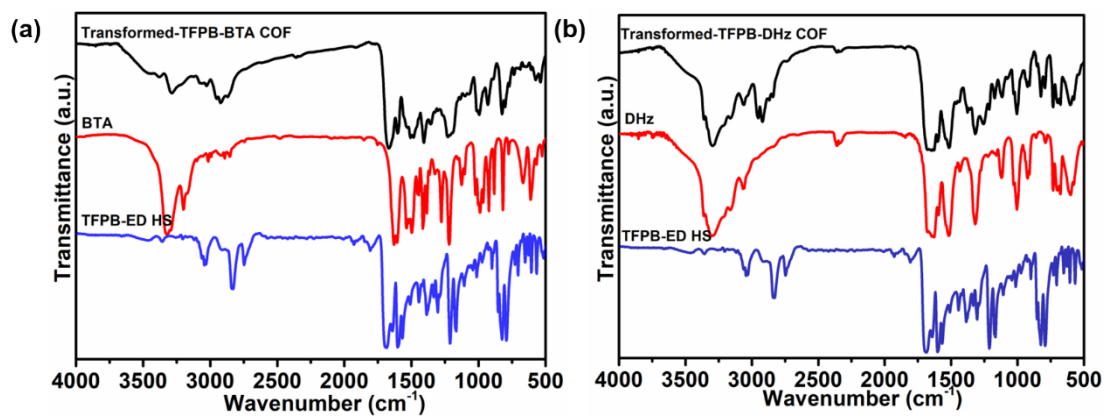

**Fig. S11.** FT IR spectra of (a) the Transformed-TFPB-BTA COF, (b) the Transformed-TFPB-DHz COF.

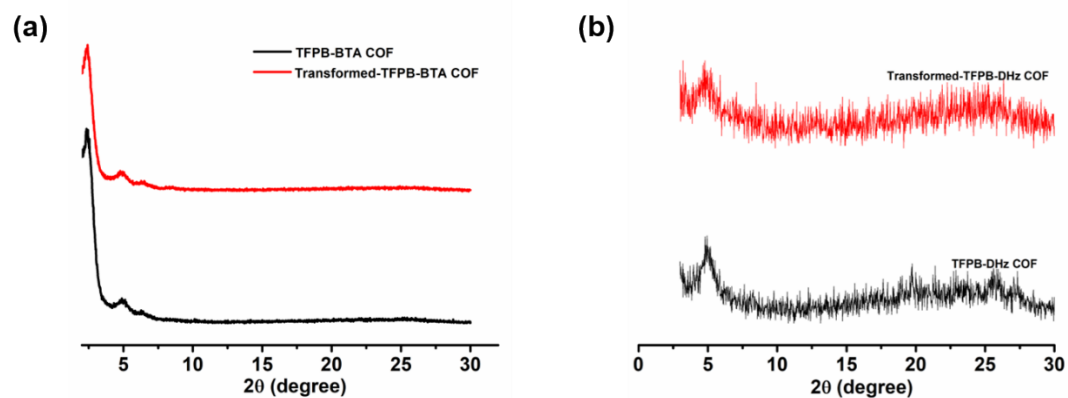

**Fig. S12.** PXRD profiles of (a) the Transformed-TFPB-BTA COF, (b) the Transformed-TFPB-DHz COF.

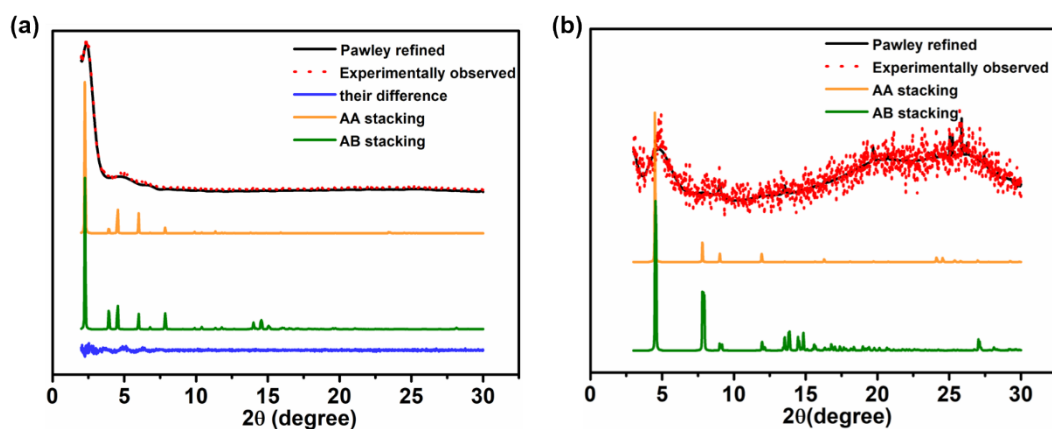

**Fig. S13.** (a) PXRD profiles of the Transformed-TFPB-BTA COF of the experimentally observed (red), Pawley refined (black) and their difference (blue), simulated using the AA (orange) stacking

mode, simulated using the AB (green) stacking mode, (b) PXRD profiles of the Transformed-TFPB-DHz COF of the experimentally observed (red), Pawley refined (black), simulated using the AA (orange) stacking mode, simulated using the AB (green) stacking mode.

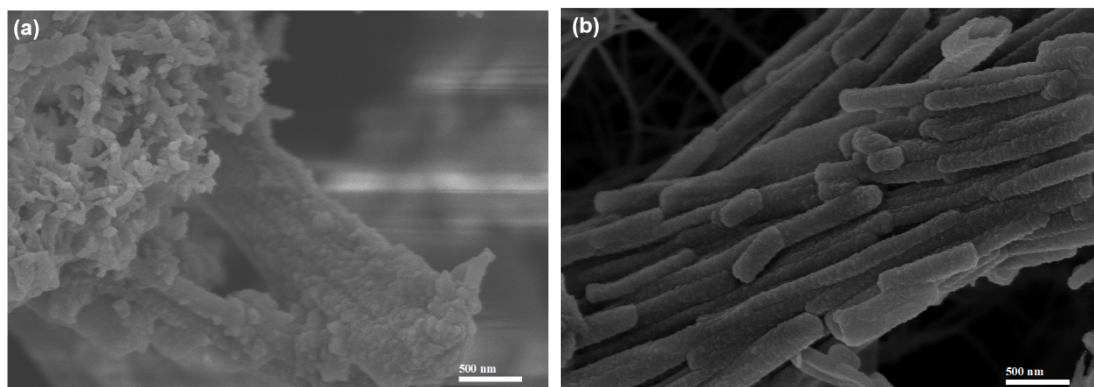

**Fig. S14.** SEM images of (a) the Transformed-TFPB-BTA COF, (b) the Transformed-TFPB-DHz COF.

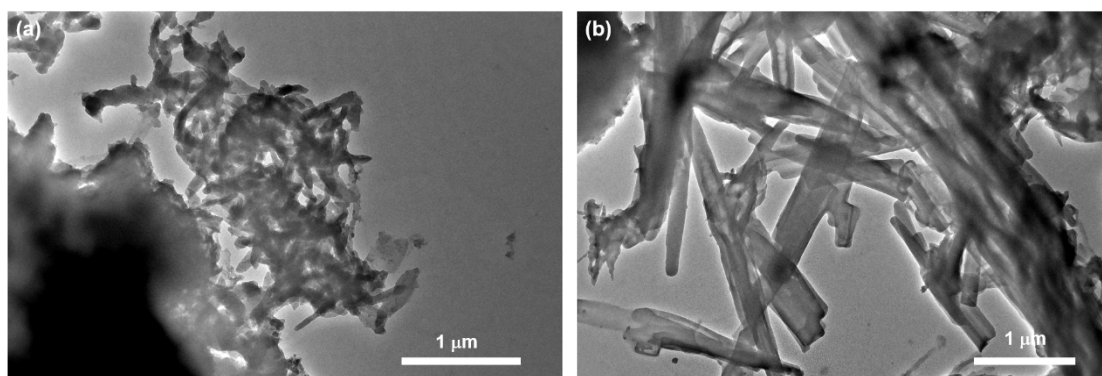

**Fig. S15.** TEM images of (a) the Transformed-TFPB-BTA COF, (b) the Transformed-TFPB-DHz COF.



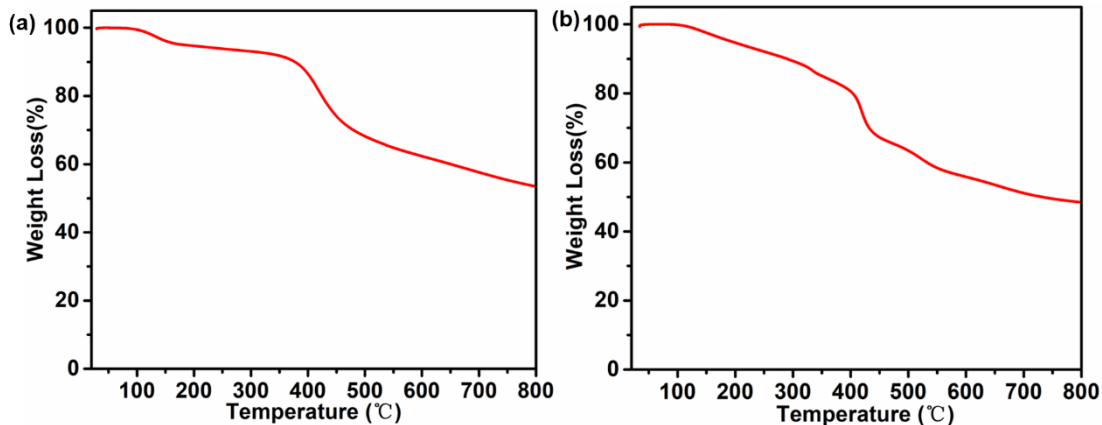

**Fig. S16.** TGA curve of (a) the Transformed-TFPB-BTA COF, (b) the Transformed-TFPB-DHz COF.

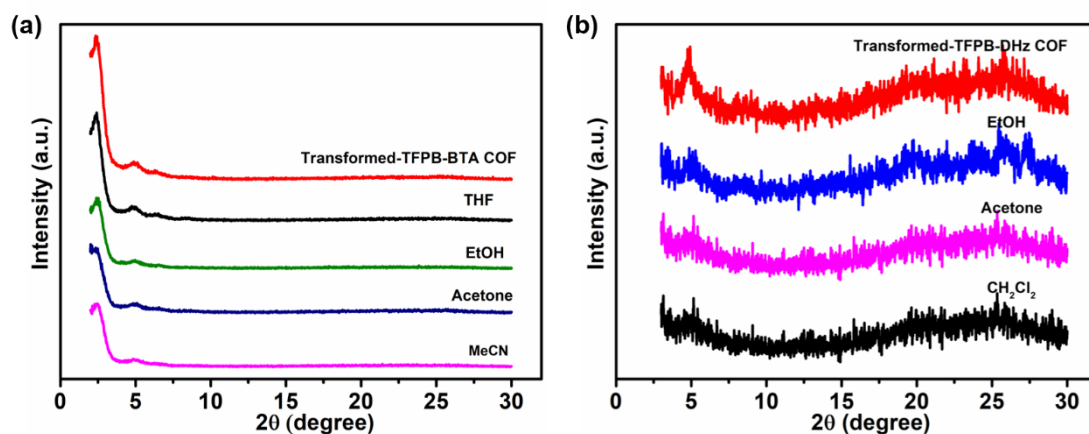

**Fig. S17.** XRD patterns of (a) the Transformed-TFPB-BTA COF, (b) the Transformed-TFPB-DHz COF after immersing in various solvents for 72 h.

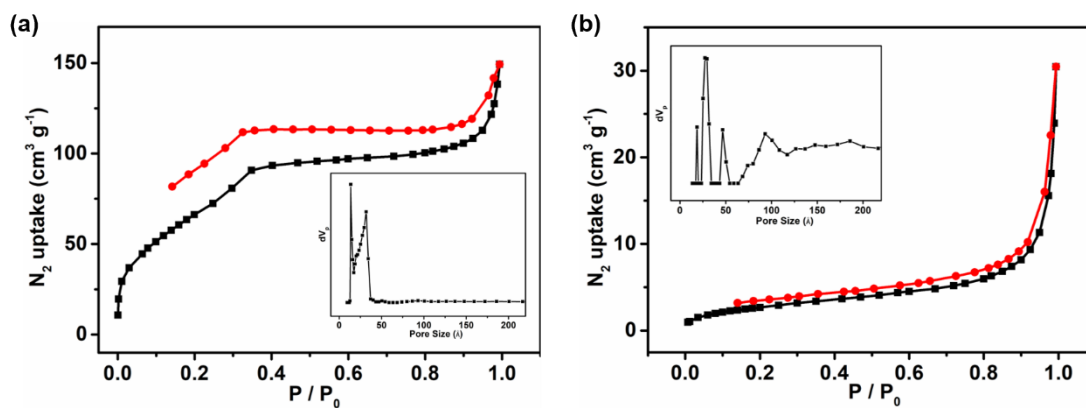

**Fig. S18.** N<sub>2</sub> adsorption / desorption isotherms of (a) the Transformed-TFPB-BTA COF, (b) the Transformed-TFPB-DHz COF (inset: pore size distribution). BET surface of the Transformed-

TFPB-DHz COF is poor, which is attributed to the low crystallinity.

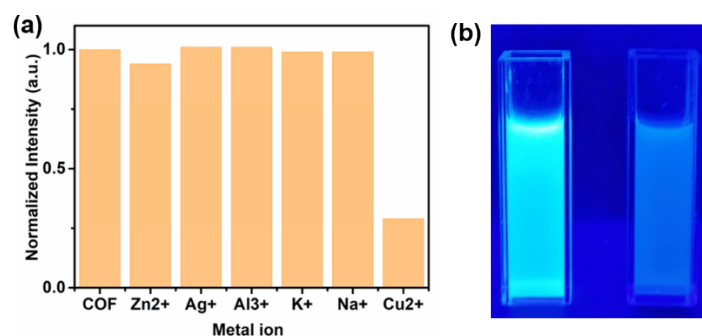

**Fig. S19.** (a) Comparison of the luminescence intensity of the Transformed-TFPB-DETH COF in the presence of various metal ions (24.8  $\mu\text{mol} / \text{L}$ ) in EtOH ( $\lambda_{\text{ex}} = 365 \text{ nm}$ ), (b) a photo showing fluorescence change (under a UV lamp with  $\lambda_{\text{ex}} = 365 \text{ nm}$ ) of the Transformed-COF in EtOH upon addition of 24.8  $\mu\text{mol} / \text{L}$  of  $\text{Cu}^{2+}$ .

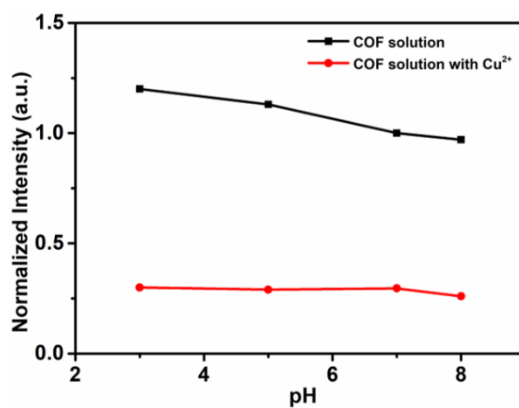

**Fig. S20.** Effect of pH on the detection of  $\text{Cu}^{2+}$  for the Transformed-TFPB-DETH COF.

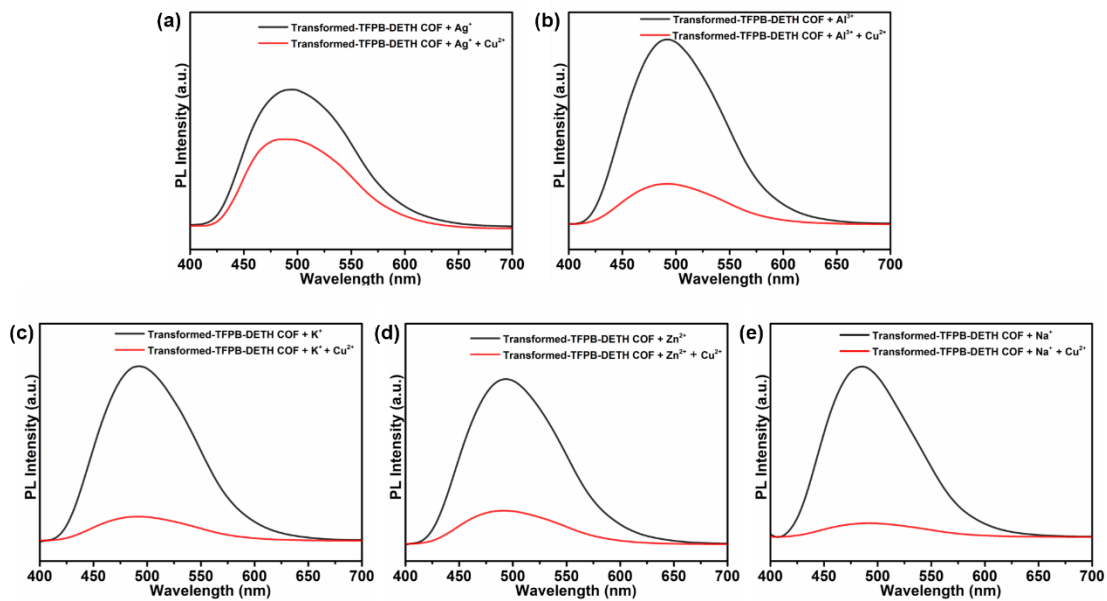

**Fig. S21.** Effect of different metal ions on the detection of  $\text{Cu}^{2+}$  for the Transformed-TFPB-DETH COF.

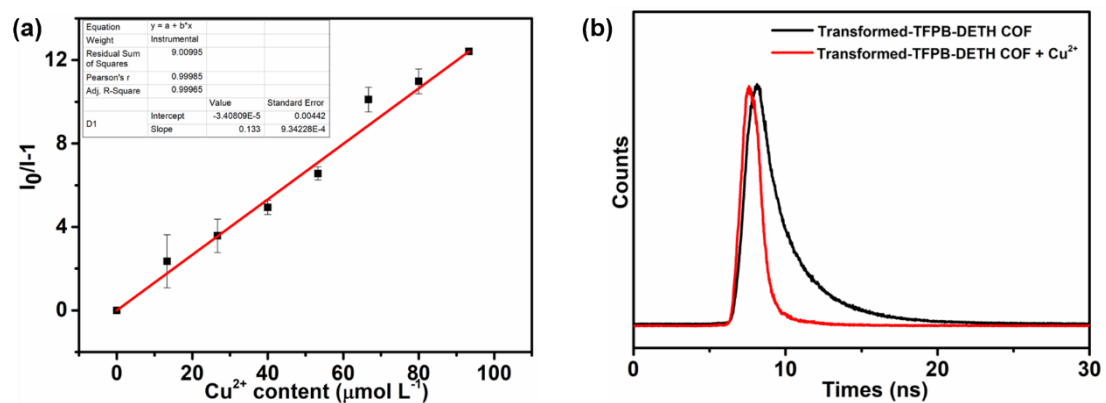

**Fig. S22.** (a) The linear correlation between the fluorescence change of Transformed-TFPB-DETH COF and different concentrations of  $\text{Cu}^{2+}$  in EtOH ( $R^2=0.999$ ), (b) fluorescence lifetime of the Transformed-TFPB-DETH COF before and after adding  $\text{Cu}^{2+}$ .

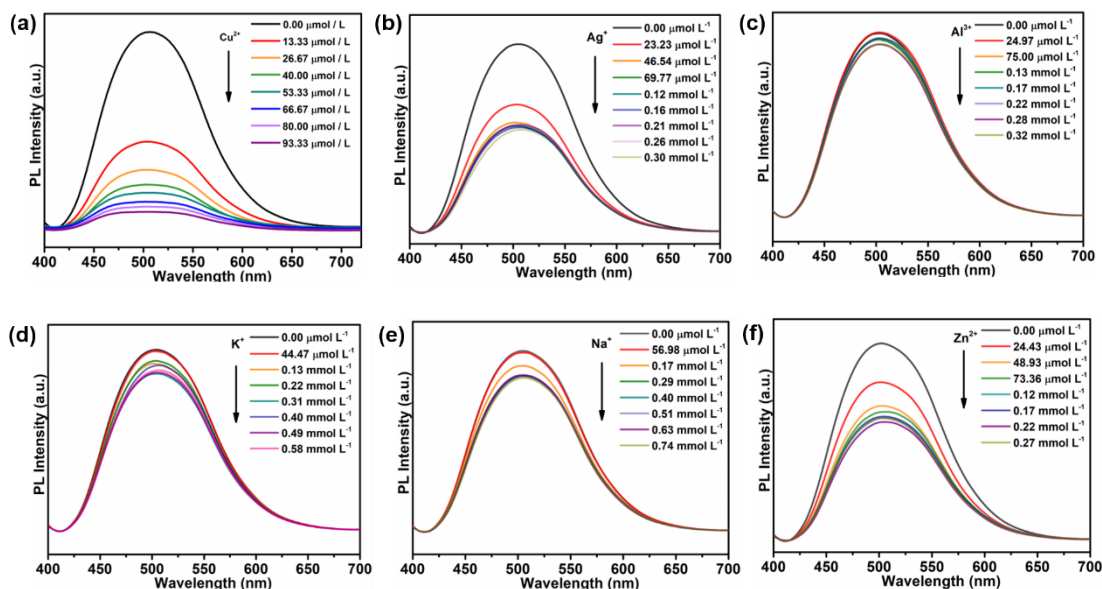

**Fig. S23.** Emission spectra of the Transformed-TFPB-BTA COF in EtOH suspensions containing various contents of (a)  $\text{Cu}^{2+}$ , (b)  $\text{Ag}^+$ , (c)  $\text{Al}^{3+}$ , (d)  $\text{K}^+$ , (e)  $\text{Na}^+$ , (f)  $\text{Zn}^{2+}$ .

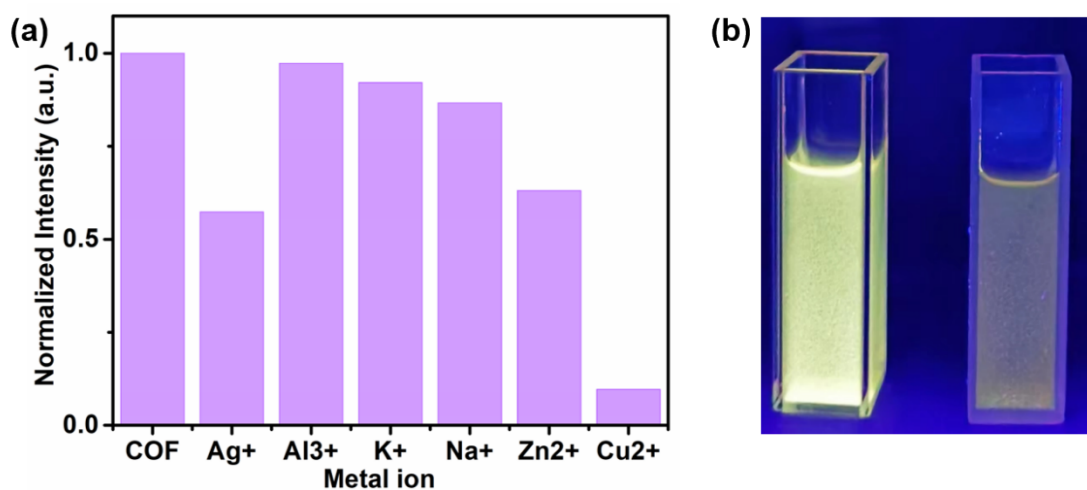

**Fig. S24.** (a) Comparison of the luminescence intensity of the Transformed-TFPB-BTA COF in the presence of various metal ions (0.12 mmol / L) in EtOH ( $\lambda_{\text{ex}} = 365 \text{ nm}$ ), (b) A photo showing fluorescence change (under a UV lamp with  $\lambda_{\text{ex}} = 365 \text{ nm}$ ) of the Transformed-TFPB-BTA COF in EtOH upon addition of 0.12 mmol / L of  $\text{Cu}^{2+}$ .

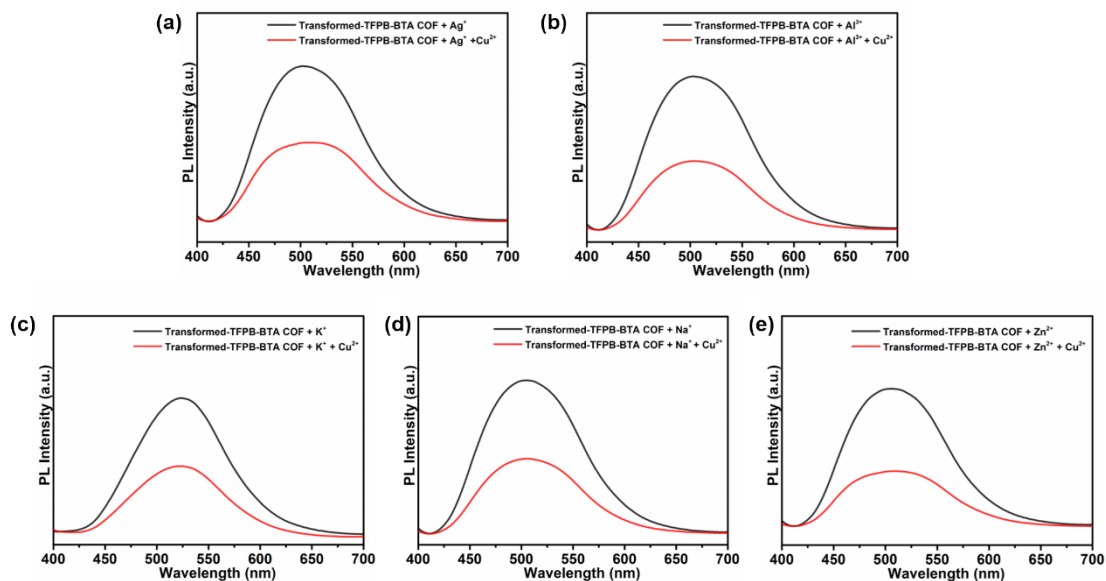

**Fig. S25.** Effect of different metal ions (100 mmol) on the detection of  $\text{Cu}^{2+}$  for the Transformed-TFPB-BTA COF.

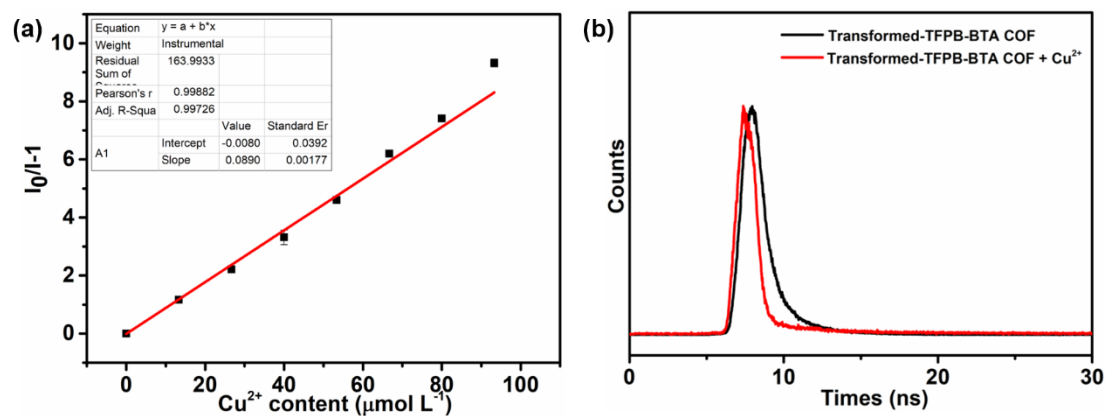

**Fig. S26.** (a) The linear correlation between the fluorescence change of the Transformed-TFPB-BTA COF and different concentrations of  $\text{Cu}^{2+}$  in EtOH ( $R^2=0.997$ ), (b) fluorescence lifetime of the Transformed-TFPB-BTA COF before and after adding  $\text{Cu}^{2+}$ .

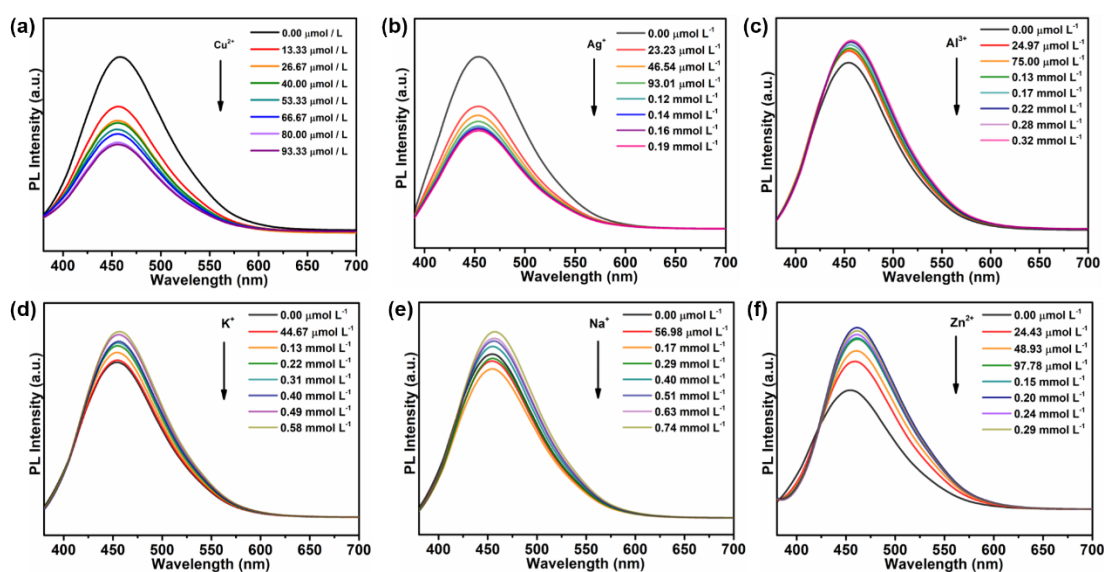

**Fig. S27.** Emission spectra of the Transformed-TFPB-DHz COF in EtOH suspensions containing various contents of (a)  $\text{Cu}^{2+}$ , (b)  $\text{Ag}^+$ , (c)  $\text{Al}^{3+}$ , (d)  $\text{K}^+$ , (e)  $\text{Na}^+$ , (f)  $\text{Zn}^{2+}$ .

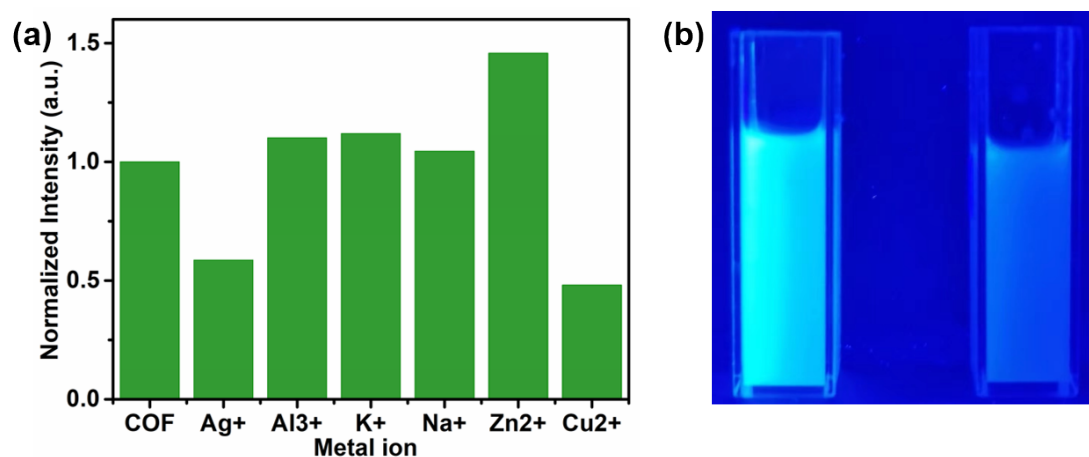

**Fig. S28.** (a) Comparison of the luminescence intensity of the Transformed-TFPB-DHz COF in the presence of various metal ions (0.17  $\text{mmol/L}$ ) in EtOH ( $\lambda_{\text{ex}} = 365 \text{ nm}$ ), (b) a photo showing fluorescence change (under a UV lamp with  $\lambda_{\text{ex}} = 365 \text{ nm}$ ) of the Transformed-TFPB-DHz COF in EtOH upon addition of 0.17  $\text{mmol/L}$  of  $\text{Cu}^{2+}$ .

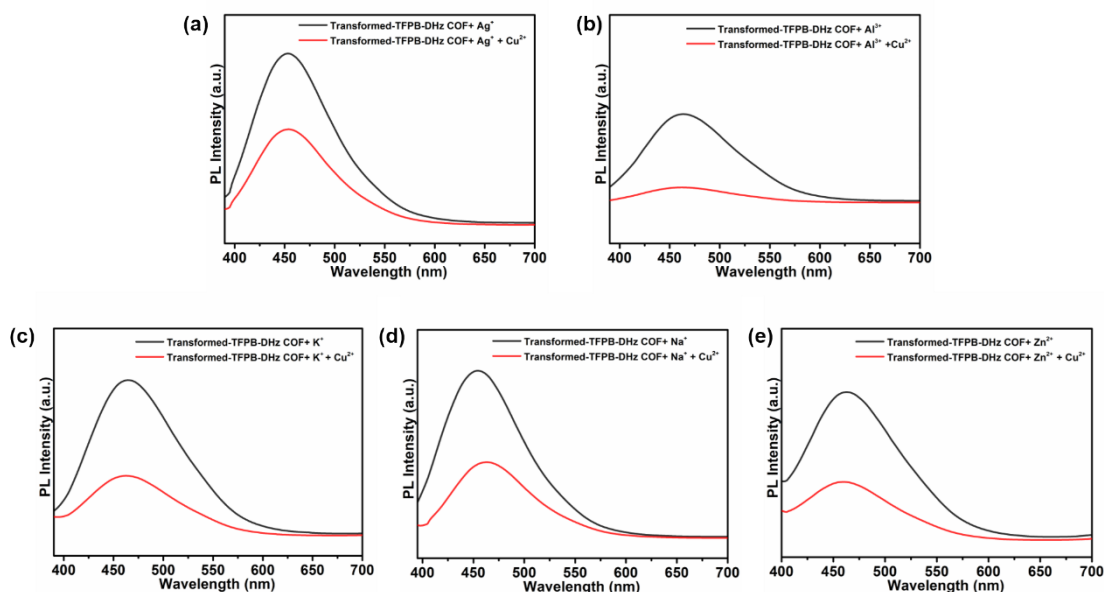

**Fig. S29.** Effect of different metal ions (100 mmol) on the detection of  $\text{Cu}^{2+}$  for the Transformed-TFPB-DHz COF.

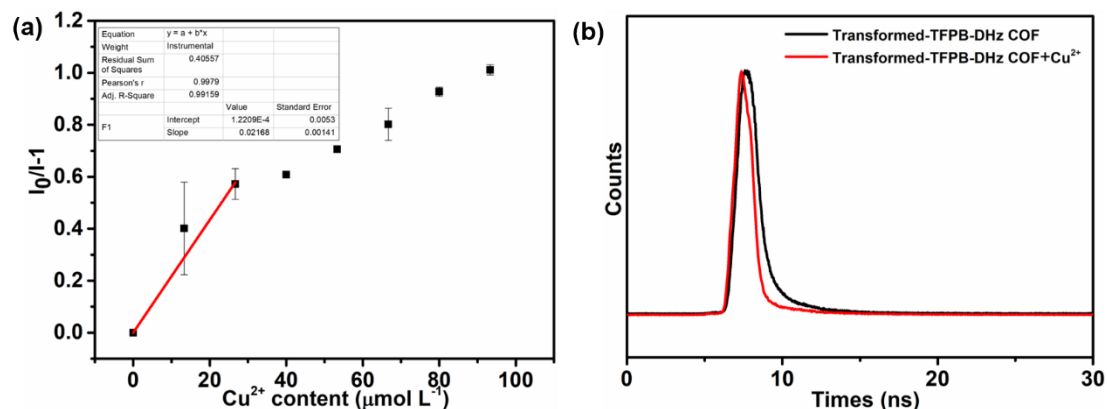

**Fig. S30.** (a) The linear correlation between the fluorescence change of Transformed-TFPB-DHz COF and different concentrations of  $\text{Cu}^{2+}$  in EtOH ( $R^2=0.992$ ), (b) fluorescence lifetime of the Transformed-TFPB-DHz COF before and after adding  $\text{Cu}^{2+}$ .

**Table S2.** Atomic coordinates of the Transformed-TFPB-DETH COF for the AA-stacking mode.

|                                                                          |             |            |            |            |
|--------------------------------------------------------------------------|-------------|------------|------------|------------|
| <b>Sample Name:</b> Transformed-TFPB-DETH COF                            |             |            |            |            |
| <b>Space Group:</b> P6                                                   |             |            |            |            |
| a=44.94, b= 44.94, c= 3.82; $\alpha=\beta=90^\circ$ , $\gamma=120^\circ$ |             |            |            |            |
| $R_{wp}=7.14\%$                                                          |             |            |            |            |
| <b>Atom</b>                                                              | <b>type</b> | <b>x/a</b> | <b>y/b</b> | <b>z/c</b> |

|     |   |         |         |          |
|-----|---|---------|---------|----------|
| C1  | C | 0.40271 | 0.7603  | -0.11393 |
| C2  | C | 0.42066 | 0.79621 | -0.10665 |
| N3  | N | 0.43102 | 0.52498 | -0.02081 |
| N4  | N | 0.41292 | 0.54308 | -0.0227  |
| O5  | O | 0.47536 | 0.56413 | -0.33886 |
| C6  | C | 0.35614 | 0.75975 | 0.20977  |
| C7  | C | 0.37377 | 0.79566 | 0.20907  |
| C8  | C | 0.31516 | 0.68437 | 0.04458  |
| C9  | C | 0.51922 | 0.48289 | -0.17685 |
| C10 | C | 0.29696 | 0.64824 | 0.04477  |
| C11 | C | 0.37024 | 0.74145 | 0.04666  |
| C12 | C | 0.40627 | 0.81416 | 0.054    |
| C13 | C | 0.42465 | 0.85203 | 0.06106  |
| C14 | C | 0.46362 | 0.48095 | -0.17573 |
| C15 | C | 0.462   | 0.53652 | -0.18663 |
| C16 | C | 0.48305 | 0.46433 | -0.1814  |
| O17 | O | 0.57242 | 0.53803 | -0.20315 |
| C18 | C | 0.58972 | 0.5702  | -0.02291 |
| C19 | C | 0.62434 | 0.5759  | 0.09687  |
| H20 | H | 0.41397 | 0.74748 | -0.25464 |
| H21 | H | 0.44545 | 0.81005 | -0.2347  |
| H22 | H | 0.41995 | 0.50172 | 0.11246  |
| H23 | H | 0.33193 | 0.74648 | 0.34801  |
| H24 | H | 0.36242 | 0.80903 | 0.33902  |
| H25 | H | 0.30112 | 0.69804 | 0.04485  |
| H26 | H | 0.41128 | 0.86512 | 0.1494   |
| H27 | H | 0.47001 | 0.43661 | -0.19683 |
| H28 | H | 0.57502 | 0.57051 | 0.21099  |
| H29 | H | 0.59361 | 0.5914  | -0.20183 |
| H30 | H | 0.63929 | 0.57509 | -0.12998 |
| H31 | H | 0.62036 | 0.55515 | 0.28157  |
| H32 | H | 0.63898 | 0.60108 | 0.23092  |

**Table S3.** Atomic coordinates of the Transformed-TFPB-BTA COF for the AA-stacking mode.

| <b>Sample Name:</b> Transformed-TFPB-BTA COF                             |     |     |     |     |
|--------------------------------------------------------------------------|-----|-----|-----|-----|
| <b>Space Group:</b> P6                                                   |     |     |     |     |
| a=45.03, b= 45.03, c= 3.85; $\alpha=\beta=90^\circ$ , $\gamma=120^\circ$ |     |     |     |     |
| R <sub>wp</sub> =7.14%                                                   |     |     |     |     |
| Atom                                                                     | Typ | x/a | y/b | z/c |
|                                                                          | e   |     |     |     |



|     |   |          |          |          |
|-----|---|----------|----------|----------|
| C1  | C | 0.4868   | 0.52259  | 1.19108  |
| C2  | C | 0.46448  | 0.48697  | 1.19785  |
| C3  | C | 0.47709  | 0.46404  | 1.20697  |
| C4  | C | 0.47269  | 0.54615  | 1.17478  |
| N5  | N | 0.55628  | 0.46213  | 0.99451  |
| N6  | N | 0.5695   | 0.43974  | 0.98447  |
| O7  | O | 0.51186  | 0.42572  | 1.32246  |
| O8  | O | 0.54494  | 0.57115  | 1.19943  |
| C9  | C | 0.57319  | 0.58466  | 1.4366   |
| C10 | C | 0.60641  | 0.60022  | 1.24052  |
| C11 | C | 0.62855  | 0.63392  | 1.24271  |
| C12 | C | -0.70231 | -0.34694 | -0.20933 |
| C13 | C | -0.68825 | -0.36867 | -0.20974 |
| C14 | C | -0.74026 | -0.36146 | -0.20522 |
| C15 | C | -0.5884  | -0.24429 | -0.36796 |
| C16 | C | -0.56628 | -0.20883 | -0.3589  |
| C17 | C | -0.57607 | -0.18743 | -0.19187 |
| C18 | C | -0.6084  | -0.20209 | -0.0325  |
| C19 | C | -0.63034 | -0.23758 | -0.03676 |
| C20 | C | -0.84945 | -0.40216 | -0.18572 |
| H21 | H | 0.43706  | 0.47683  | 1.19529  |
| H22 | H | 0.56847  | 0.48503  | 0.85376  |
| H23 | H | 0.57223  | 0.56488  | 1.61566  |
| H24 | H | 0.57178  | 0.60429  | 1.59923  |
| H25 | H | 0.61276  | 0.5835   | 1.09509  |
| H26 | H | 0.65237  | 0.64421  | 1.0983   |
| H27 | H | 0.6232   | 0.65147  | 1.38625  |
| H28 | H | -0.70519 | -0.39611 | -0.20911 |
| H29 | H | -0.58033 | -0.25976 | -0.51006 |
| H30 | H | -0.54161 | -0.19805 | -0.4869  |
| H31 | H | -0.61655 | -0.18623 | 0.10121  |
| H32 | H | -0.65442 | -0.24794 | 0.10111  |
| H33 | H | -0.8599  | -0.38836 | -0.32194 |

**Table S4.** Atomic coordinates of the Transformed-TFPB-DHz COF for the AA-stacking mode.

|                                                                          |             |            |            |            |
|--------------------------------------------------------------------------|-------------|------------|------------|------------|
| <b>Sample Name:</b> Transformed-TFPB-DHz COF                             |             |            |            |            |
| <b>Space Group:</b> P-6                                                  |             |            |            |            |
| a=22.87, b= 22.87, c= 3.48; $\alpha=\beta=90^\circ$ , $\gamma=120^\circ$ |             |            |            |            |
| $R_{wp}=15.04\%$                                                         |             |            |            |            |
| <b>Atom</b>                                                              | <b>Type</b> | <b>x/a</b> | <b>y/b</b> | <b>z/c</b> |
| N1                                                                       | N           | 0.14181    | 0.53924    | 0.5        |

|     |   |         |         |     |
|-----|---|---------|---------|-----|
| N2  | N | 0.07193 | 0.51514 | 0.5 |
| O3  | O | 0.16425 | 0.64609 | 0.5 |
| C4  | C | 0.54854 | 0.41071 | 0.5 |
| C5  | C | 0.52597 | 0.45733 | 0.5 |
| C6  | C | 0.66388 | 0.50248 | 0.5 |
| C7  | C | 0.64091 | 0.5488  | 0.5 |
| C8  | C | 0.59783 | 0.31068 | 0.5 |
| C9  | C | 0.95476 | 0.42807 | 0.5 |
| C10 | C | 1.02767 | 0.45126 | 0.5 |
| C11 | C | 0.61908 | 0.26241 | 0.5 |
| C12 | C | 0.56831 | 0.18674 | 0.5 |
| C13 | C | 0.37487 | 0.73813 | 0.5 |
| C14 | C | 0.29254 | 0.59647 | 0.5 |
| C15 | C | 0.18653 | 0.60746 | 0.5 |
| H16 | H | 0.15852 | 0.50457 | 0.5 |
| H17 | H | 0.50937 | 0.35867 | 0.5 |
| H18 | H | 0.47213 | 0.43917 | 0.5 |
| H19 | H | 0.71778 | 0.52445 | 0.5 |
| H20 | H | 0.67741 | 0.60232 | 0.5 |
| H21 | H | 0.54542 | 0.29343 | 0.5 |
| H22 | H | 1.04418 | 0.41439 | 0.5 |
| H23 | H | 0.26238 | 0.54218 | 0.5 |

**Table S5.** Elemental analysis results of the COFs.

| COF                       |               | C%    | H%    | N%    |
|---------------------------|---------------|-------|-------|-------|
| TFPB-DETH COF             | <b>Calcd.</b> | 71.13 | 5.17  | 11.06 |
|                           | <b>Found</b>  | 68.14 | 5.479 | 10.10 |
| Transformed-TFPB-DETH COF | <b>Found</b>  | 69.29 | 5.419 | 10.21 |
| TFPB-DHz COF              | <b>Calcd.</b> | 73.46 | 4.11  | 14.28 |
|                           | <b>Found</b>  | 66.23 | 5.371 | 16.15 |
| Transformed-TFPB-DHz COF  | <b>Found</b>  | 64.47 | 5.664 | 14.02 |
| TFPB-BTA COF              | <b>Calcd.</b> | 72.44 | 4.94  | 10.56 |
|                           | <b>Found</b>  | 70.40 | 5.461 | 10.03 |
| Transformed-TFPB-BTA COF  | <b>Found</b>  | 70.73 | 5.549 | 9.96  |

**Table S6.** Comparison of different porous materials for Cu<sup>2+</sup> detection.

| Porous materials      | Detection limit                  | Ions             | Ref. |
|-----------------------|----------------------------------|------------------|------|
| COPs-DT               | 0.076 $\mu\text{mol} / \text{L}$ | Cu <sup>2+</sup> | 2    |
| MOF-5-NH <sub>2</sub> | 0.057 $\mu\text{mol} / \text{L}$ | Cu <sup>2+</sup> | 3    |

|                                                                                          |                       |                        |                  |
|------------------------------------------------------------------------------------------|-----------------------|------------------------|------------------|
| [Eu <sub>4</sub> (MTB) <sub>3</sub> (DMF) <sub>6</sub> ].2DMF                            | 1.98 μmol / L         | Cu <sup>2+</sup>       | 4                |
| {[Nd <sub>2</sub> (NH <sub>2</sub> -BDC) <sub>3</sub> (DMF) <sub>4</sub> ]} <sub>n</sub> | 78.7 μmol / L         | Cu <sup>2+</sup>       | 5                |
| TFPB-DHTH COF                                                                            | 12 nmol / L           | Cu <sup>2+</sup>       | 6                |
| <b>Transformed TFPB-DETH COF</b>                                                         | <b>0.082 μmol / L</b> | <b>Cu<sup>2+</sup></b> | <b>This work</b> |
| <b>Transformed TFPB-BTA COF</b>                                                          | <b>0.26 μmol / L</b>  | <b>Cu<sup>2+</sup></b> |                  |
| <b>Transformed TFPB-DHz COF</b>                                                          | <b>1.15 μmol / L</b>  | <b>Cu<sup>2+</sup></b> |                  |

## Reference

1. S. Jiang, S. D. Liu, L. C. Meng, Q. K. Qi, L. P. Wang, B. Xu, J. Q. Liu and W. J. Tian, *Science China-Chemistry*, 2020, **63**, 497-503.
2. C. Cui, Q. Wang, C. Xin, Q. Liu, X. Deng, T. Liu, X. Xu and X. Zhang, *Microporous Mesoporous Materials*, 2020, **299**, 110122.
3. X. X. An, Q. Tan, S. Pan, H. Liu and X. L. Hu, *Spectrochimica Acta Part A-Molecular and Biomolecular Spectroscopy*, 2021, **247**, 119073.
4. J. Luo, B. S. Liu, Y. C. Zhang, B. K. Wang, B. B. Guo, L. She and T. H. Chen, *Journal of Molecular Structure*, 2023, **1274**, 134460.
5. J. Luo, B. S. Liu, C. Cao, F. Wei, *Inorganic Chemistry Communications*, 2017, **76**, 18–21.
6. L. R. Ahmed, A. F. M. EL-Mahdy, C. T. Pan, and S. W. Kuo, *Materials Advances*, 2021, **2**, 4617-4629.
